# Supplementary material for: The influence of pro-longevity gene Gclc overexpression on the age-dependent changes in Drosophila transcriptome and biological functions
Source: PubMed Central journal article supplement (PMC5249042; doi:10.1186/s12864-016-3356-0), 2016-12-28
Supplement: 12864_2016_3356_MOESM1_ESM.pdf [file 12864_2016_3356_MOESM1_ESM.pdf]

# Additional file 1

## Jak-STAT signaling pathway

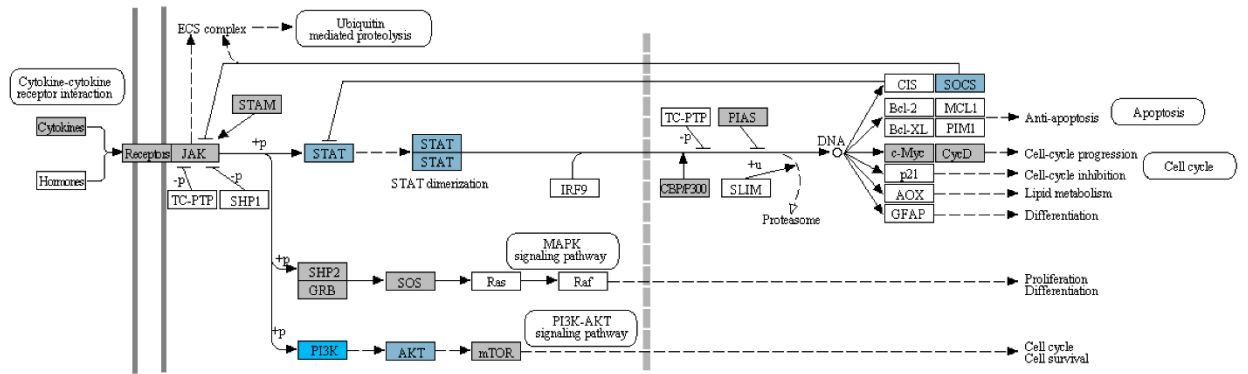

## Circadian rhythm

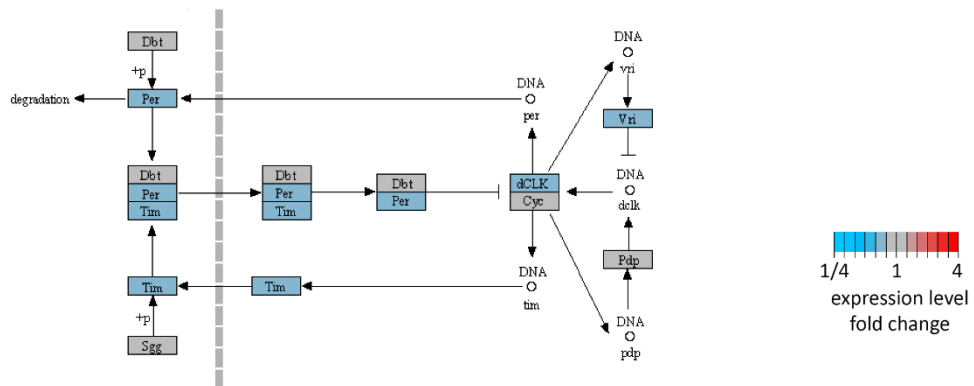

## MAPK signaling pathway

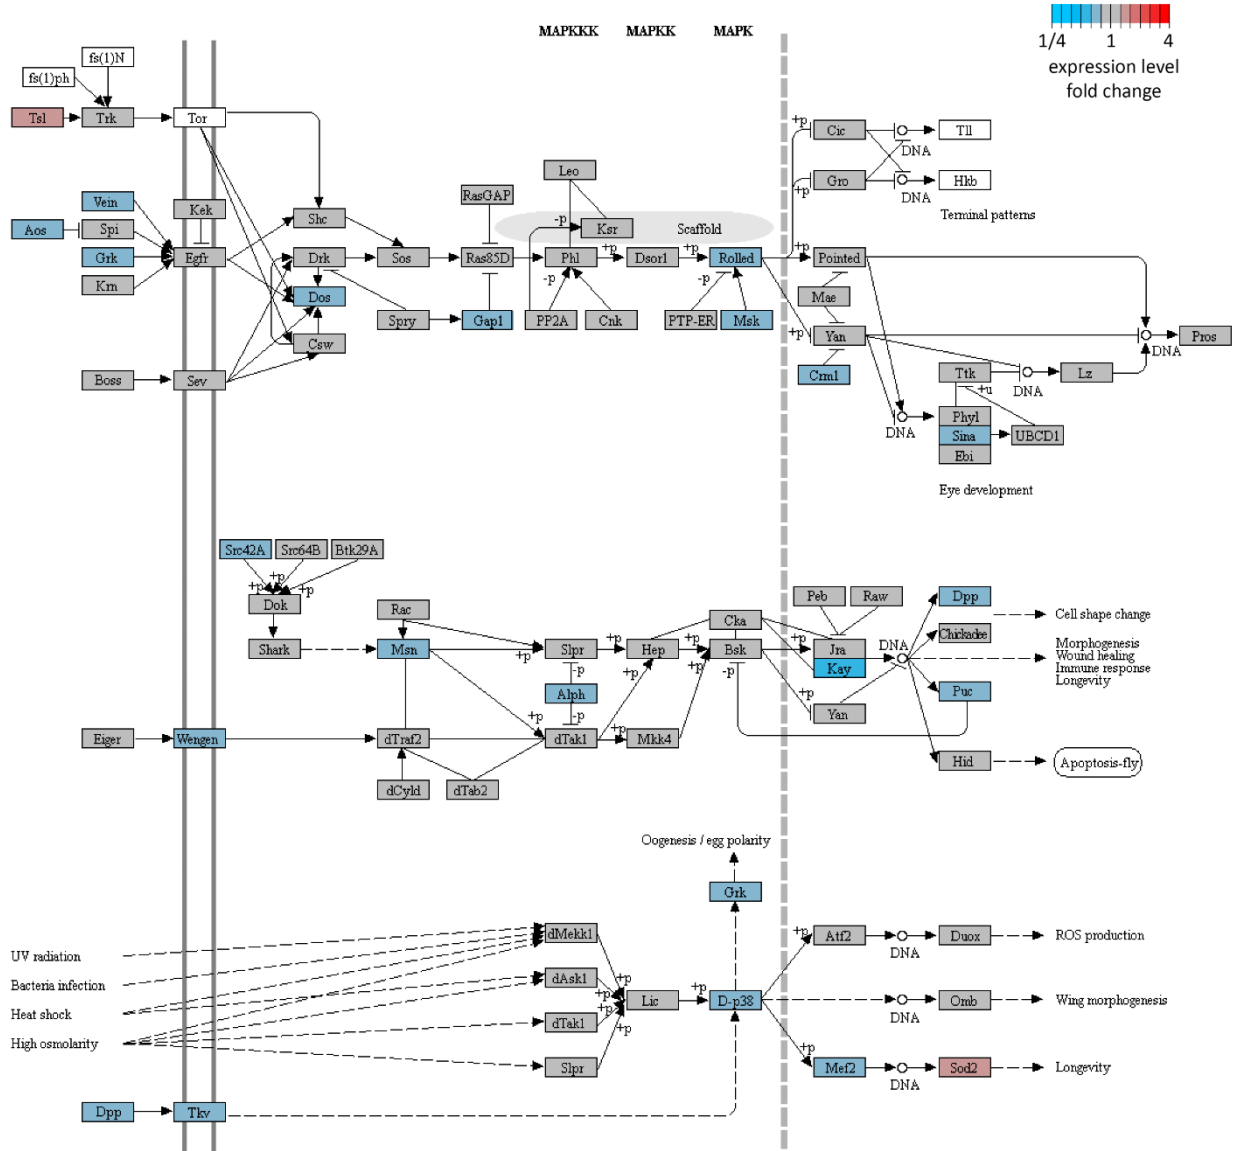

## FOXO signaling pathway

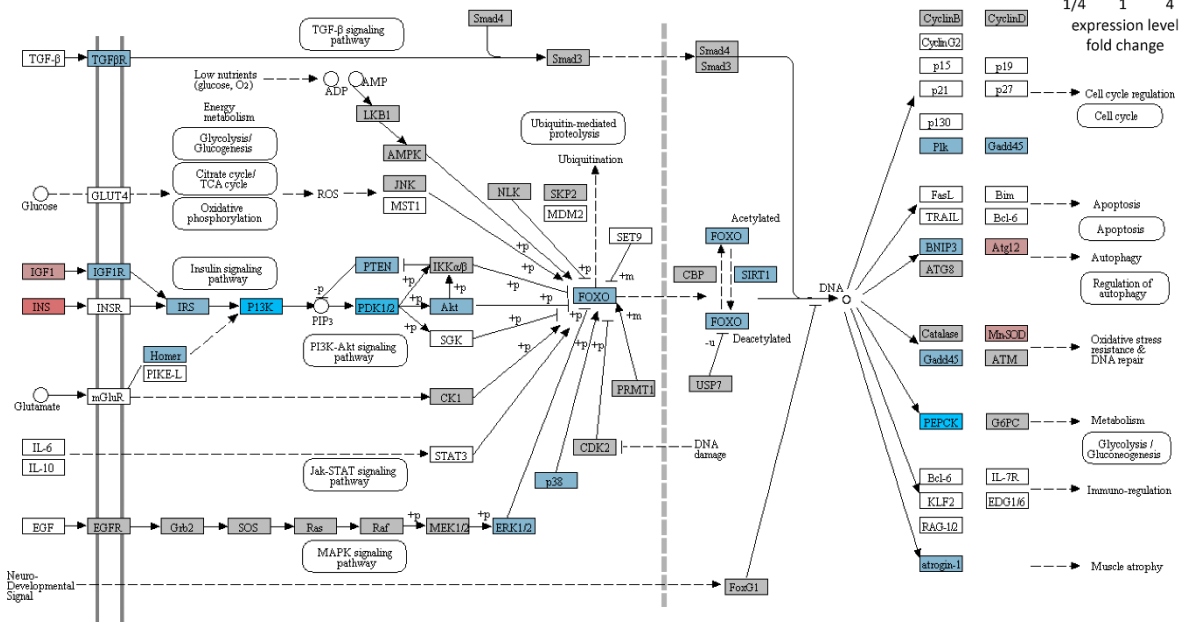

# Ribosome biogenesis

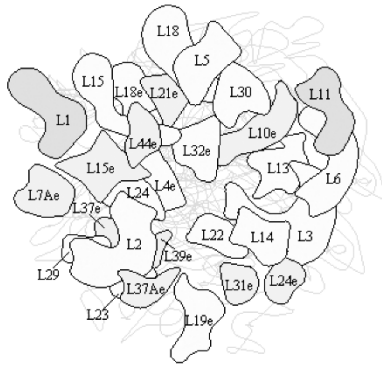

Large subunit (*Haloarcula marismortui*)

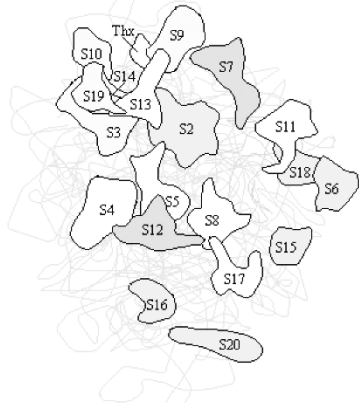

Small subunit (*Thermus aquaticus*)

## Ribosomal RNAs

|                    |     |    |      |     |
|--------------------|-----|----|------|-----|
| Bacteria / Archaea | 23S | 5S |      | 16S |
| Eukaryotes         | 25S | 5S | 5.8S | 18S |

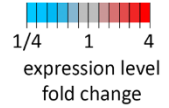

## Ribosomal proteins

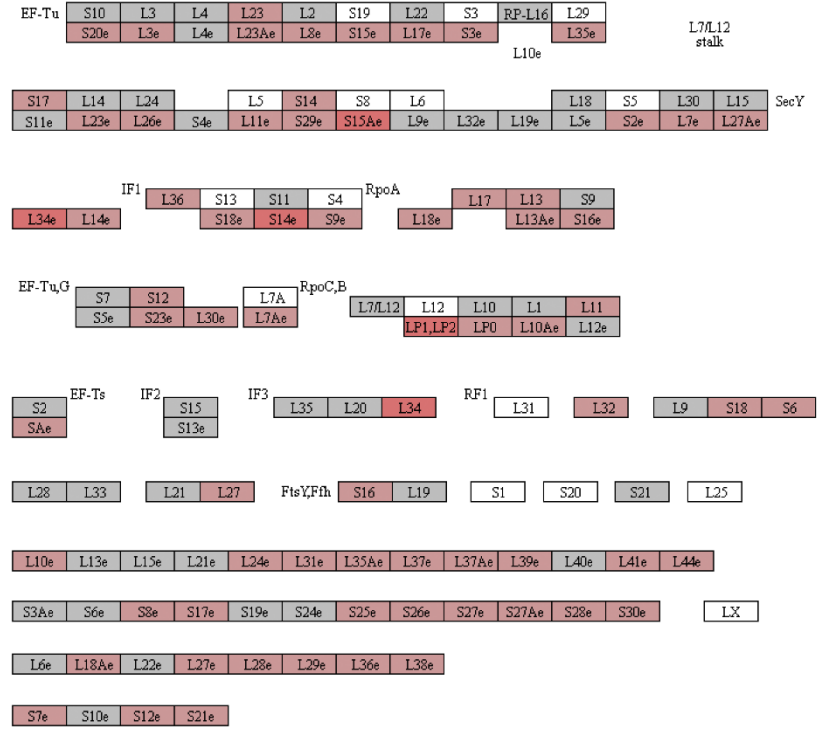

# Oxidative phosphorylation

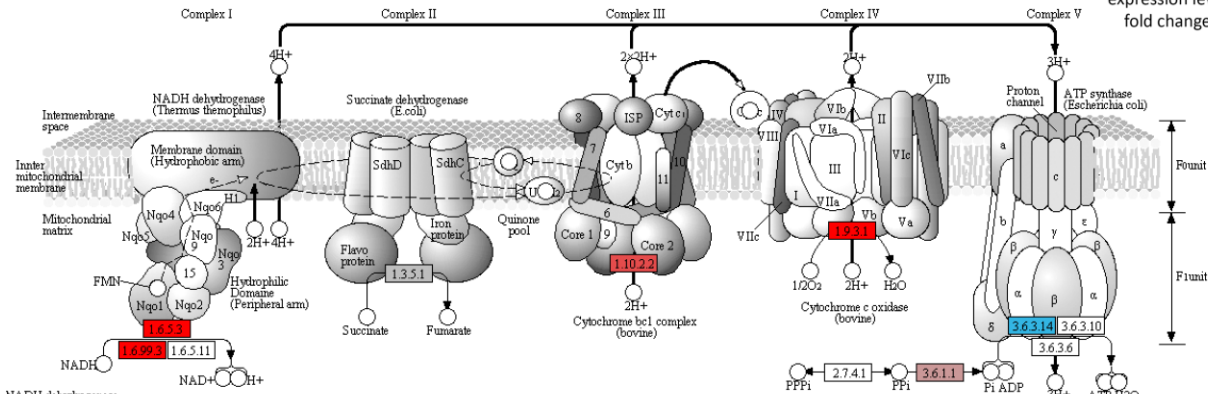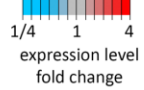

**NADH dehydrogenase**

|     |        |        |        |        |        |        |        |        |        |         |         |         |         |      |      |      |      |
|-----|--------|--------|--------|--------|--------|--------|--------|--------|--------|---------|---------|---------|---------|------|------|------|------|
| E   | ND1    | ND2    | ND3    | ND4    | ND4L   | ND5    | ND6    |        |        |         |         |         |         |      |      |      |      |
| E   | Nduf1  | Nduf2  | Nduf3  | Nduf4  | Nduf5  | Nduf6  | Nduf7  | Nduf8  | Nduf9  | Nduf10  | Nduf11  | Nduf12  | Nduf13  |      |      |      |      |
| B/A | NuoA   | NuoB   | NuoC   | NuoD   | NuoE   | NuoF   | NuoG   | NuoH   | NuoI   | NuoJ    | NuoK    | NuoL    | NuoM    | NuoN |      |      |      |
| B/A | NdhC   | NdhK   | NdhJ   | NdhH   | NdhA   | NdhI   | NdhG   | NdhE   | NdhF   | NdhD    | NdhB    | NdhL    | NdhM    | NdhN | HoxE | HoxF | HoxU |
| E   | Ndufa1 | Ndufa2 | Ndufa3 | Ndufa4 | Ndufa5 | Ndufa6 | Ndufa7 | Ndufa8 | Ndufa9 | Ndufa10 | Ndufa11 | Ndufa12 | Ndufa13 |      |      |      |      |
| E   | Ndub1  | Ndub2  | Ndub3  | Ndub4  | Ndub5  | Ndub6  | Ndub7  | Ndub8  | Ndub9  | Ndub10  | Ndub11  | Ndub12  | Ndub13  |      |      |      |      |

**Succinate dehydrogenase / Fumarate reductase**

|     |      |      |      |      |      |      |      |      |
|-----|------|------|------|------|------|------|------|------|
| E   | SDHC | SDHD | SDHA | SDHB |      |      |      |      |
| B/A | SdhC | SdhD | SdhA | SdhB | FrdA | FrdB | FrdC | FrdD |

**Cytochrome c reductase**

|       |      |       |       |      |       |       |       |       |       |       |       |       |      |      |       |       |       |       |
|-------|------|-------|-------|------|-------|-------|-------|-------|-------|-------|-------|-------|------|------|-------|-------|-------|-------|
| E/B/A | ISP  | Cyt b | Cyt 1 |      |       |       |       |       |       |       |       |       |      |      |       |       |       |       |
| E     | COX1 | COX2  | COX3  | COX4 | COX5A | COX5B | COX6A | COX6B | COX6C | COX7A | COX7B | COX7C | COX8 | COX9 | COX10 | COX11 | COX15 | COX17 |

**Cytochrome c oxidase, cbb3-type**

|     |      |      |    |     |
|-----|------|------|----|-----|
| B   | I    | II   | IV | III |
| B/A | CytA | CytB |    |     |

**Cytochrome bd complex**

|     |      |      |
|-----|------|------|
| B/A | CydA | CydB |
|-----|------|------|

**F-type ATPase (Bacteria)**

|       |      |       |       |         |
|-------|------|-------|-------|---------|
| alpha | beta | gamma | delta | epsilon |
| a     | b    | c     |       |         |

**F-type ATPase (Eukaryotes)**

|       |      |       |       |         |   |
|-------|------|-------|-------|---------|---|
| alpha | beta | gamma | delta | epsilon |   |
| OSCP  | a    | b     | c     | d       | e |
| f     | g    | h/h   | j     | k       | 8 |

**V/A-type ATPase (Bacteria, Archaea)**

|   |   |   |   |   |   |     |
|---|---|---|---|---|---|-----|
| A | B | C | D | E | F | G/H |
| i | K |   |   |   |   |     |

**V-type ATPase (Eukaryotes)**

|   |   |   |   |    |   |   |   |
|---|---|---|---|----|---|---|---|
| A | B | C | D | E  | F | G | H |
| a | c | d | e | S1 |   |   |   |

**Additional file 1.** Upregulated and downregulated pathways changing activity during aging of flies with overexpression of the *Gclc* gene and without overexpression based on KEGG data. This figure shows both genes with statistically significant differential expression ( $p < 0.05$ ) and genes that only demonstrate up/down-regulation trends (statistically insignificant; almost all of them have low absolute LogFC values and are marked with light shades).
